# Supplementary material for: Identification of Diverse Lipid Droplet Targeting Motifs in the PNPLA Family of Triglyceride Lipases
Source: PubMed Central journal article supplement (PMC3669214; doi:10.1371/journal.pone.0064950), 2013-05-31

A

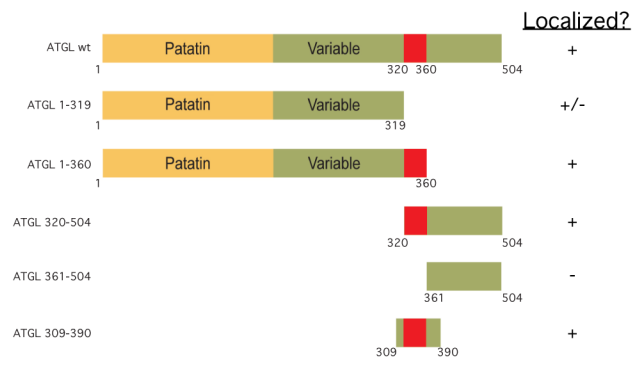

B

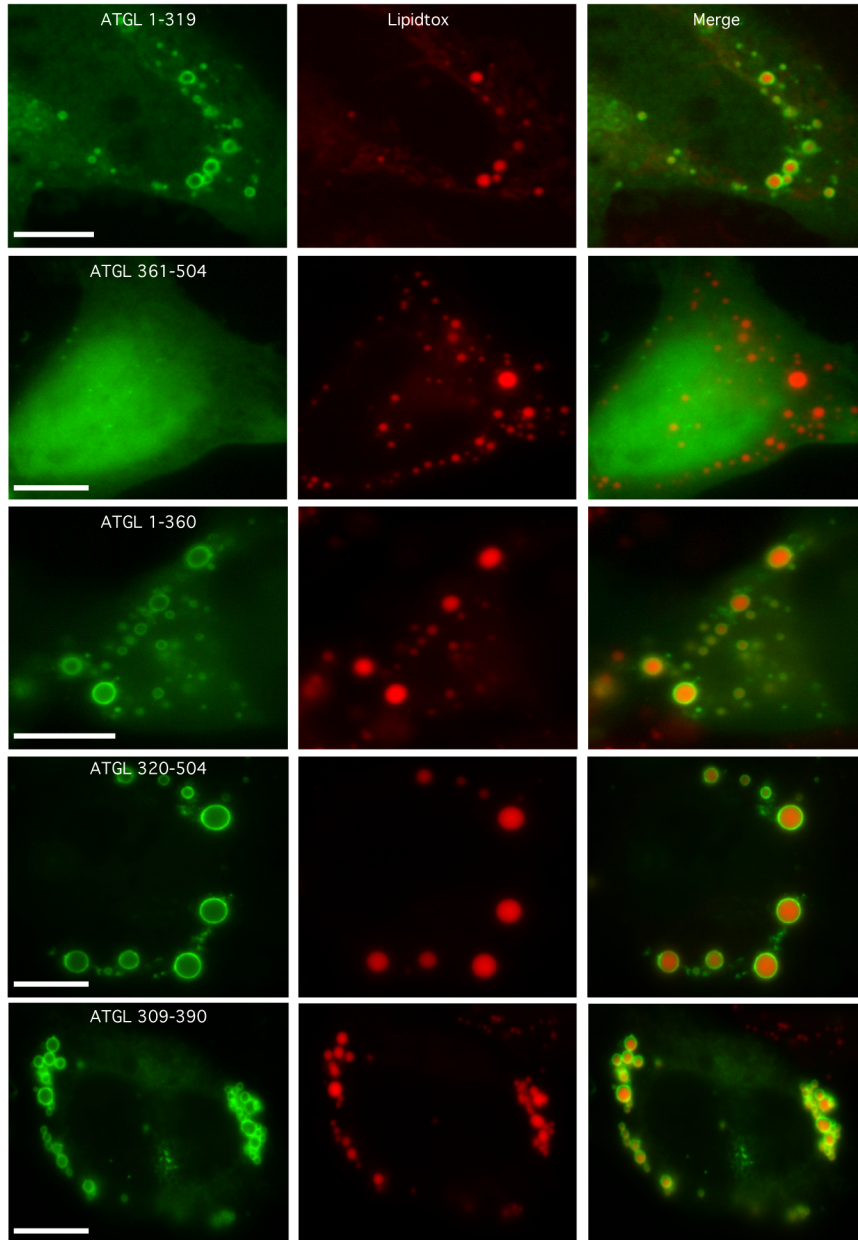

Supplement: pone.0064950.s003.pdf [file pone.0064950.s003.pdf]
